# Supplementary material for: Oxidized few layer graphene and graphite as metal-free catalysts for aqueous sulfide oxidation
Source: Royal Society of Chemistry journal article supplement (doi:10.1039/c3ta10541e), 2013-01-01
Supplement: c3ta10541e.pdf [file c3ta10541e.pdf]

## Oxidized graphene and graphite as metal-free catalysts for aqueous sulfide oxidation

Bruno R. S. Lemos<sup>1</sup>, Ivo F. Teixeira<sup>1</sup>, Bruno F. Machado<sup>2</sup>, Marcos Roberto Abreu<sup>1</sup>, João P. de Mesquita<sup>1</sup>, Ronny R. Ribeiro<sup>3</sup>, Revathi R. Bacsa<sup>2</sup>, Philippe Serp<sup>2,\*</sup>, Rochel M. Lago<sup>1,\*</sup>

### Supplementary Material

#### 1. Tables

**Table S1** - Average diameter of graphites and graphenes obtained.

| Sample | $\lambda$ / nm | $2\theta$ / ° | $d_{002}$ / nm | $L_a$ / nm | $L_c$ / nm |
|--------|----------------|---------------|----------------|------------|------------|
| GT     | 0.1540         | 26.5388       | 0.3355         | 42.6       | 20.6       |
| GT-80  | 0.1540         | 26.5603       | 0.3352         | 44.1       | 21.3       |
| GT-140 | 0.1540         | 26.5102       | 0.3358         | 44.1       | 21.3       |
| GN     | 0.1540         | 26.2870       | 0.3386         | 22.7       | 11         |
| GN-80  | 0.1540         | 26.3362       | 0.3380         | 21.7       | 10.5       |
| GN-140 | 0.1540         | 26.2498       | 0.3391         | 23.3       | 11.3       |

**Table S2** – Raman data of graphenes and graphites.

|        | G position/cm <sup>-1</sup> | G' position/cm <sup>-1</sup> | G FWHM | G' FWHM | I <sub>G</sub> /I <sub>G'</sub> |
|--------|-----------------------------|------------------------------|--------|---------|---------------------------------|
| GN     | 1576.32                     | 2650.94                      | 35.29  | 59.94   | 1.02                            |
| GN 80  | 1579.40                     | 2656.74                      | 37.84  | 98.05   | 1.78                            |
| GN 140 | 1578.95                     | 2656.83                      | 30.97  | 51.50   | 1.16                            |
| GT     | 1580.11                     | 2664.76                      | 34.95  | 73.29   | 1.11                            |
| GT 80  | 1582.96                     | 2663.24                      | 35.13  | 68.98   | 0.74                            |
| GT 140 | 1582.42                     | 2663.97                      | 31.16  | 76.64   | 0.25                            |

## 2. Figures

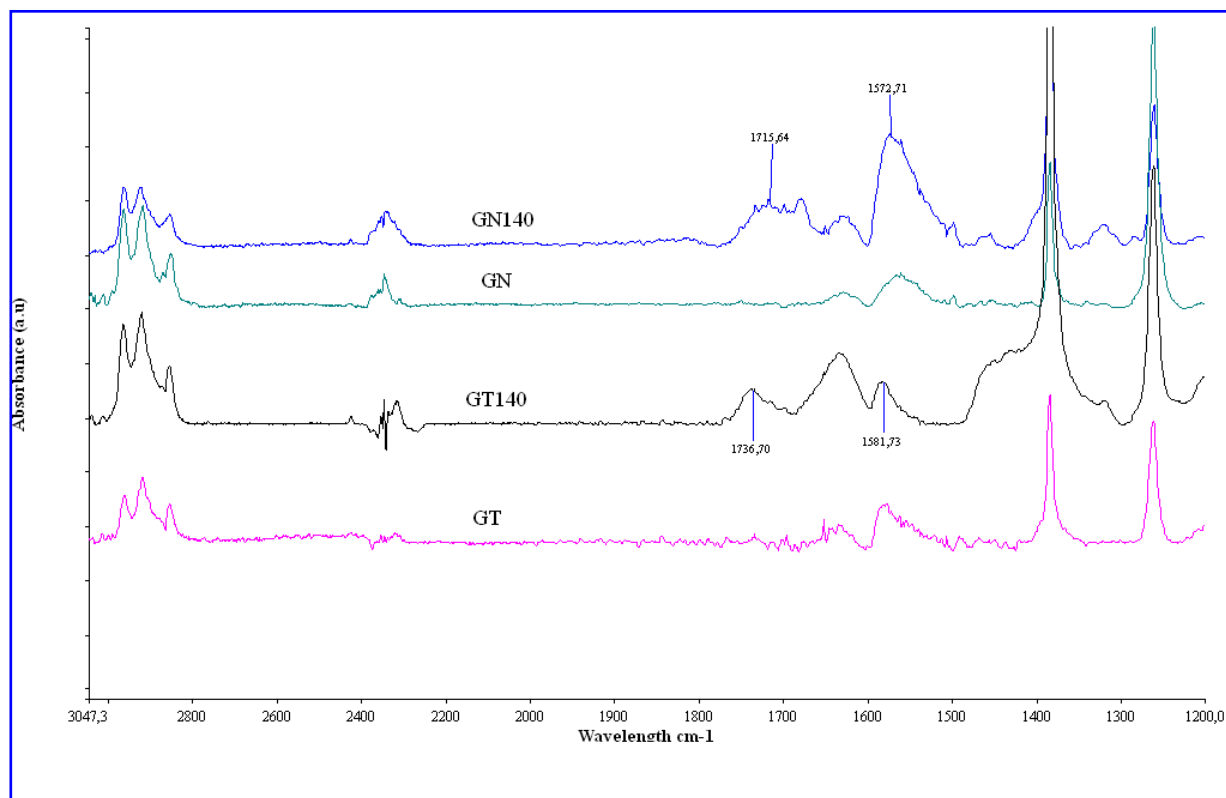

**Figure S1:** FTIR spectra of GN and GT in KBr before and after functionalisation with HNO<sub>3</sub> at 140°C.

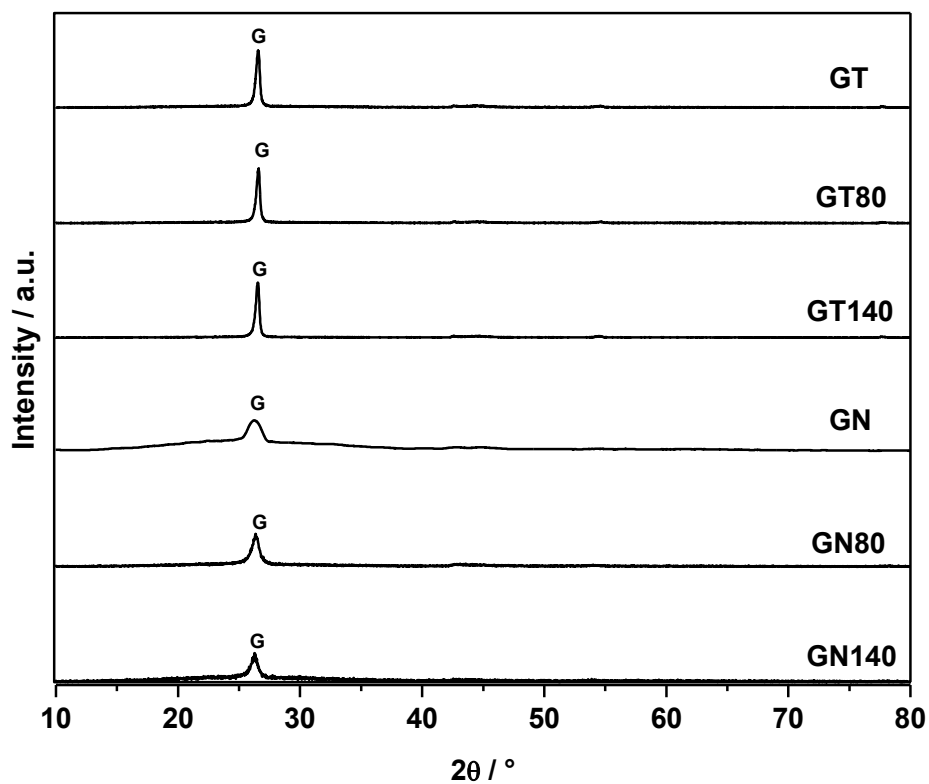

**Fig. S2** - Diffractograms of graphenes and graphites functionalized by treatment with HNO<sub>3</sub>.

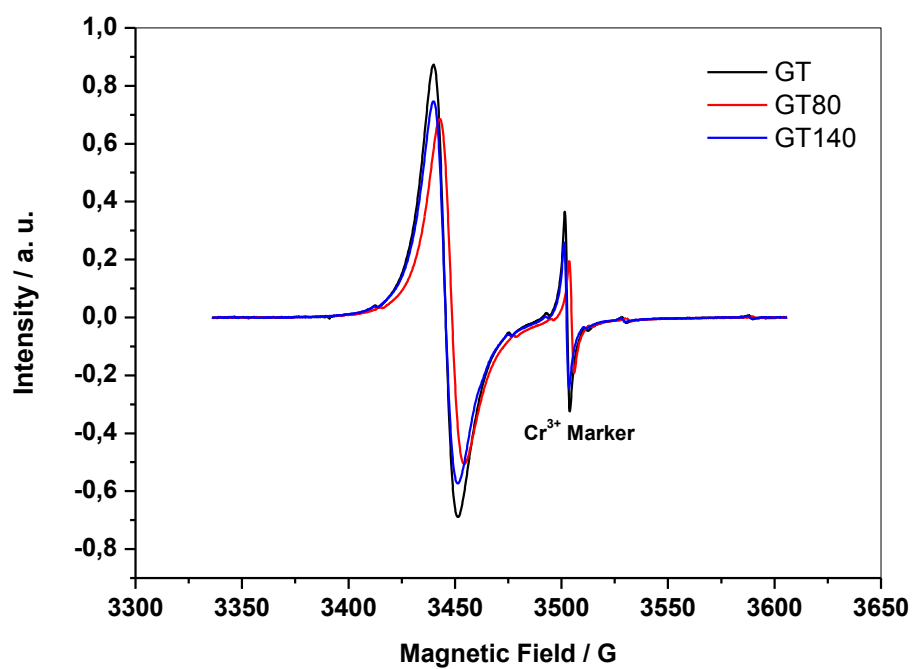

**Fig. S3** - Room temperature Electron Paramagnetic Resonance spectrum of the graphite samples. The absolute line areas are normalized to the Cr<sup>3+</sup> marker and the sample masses.

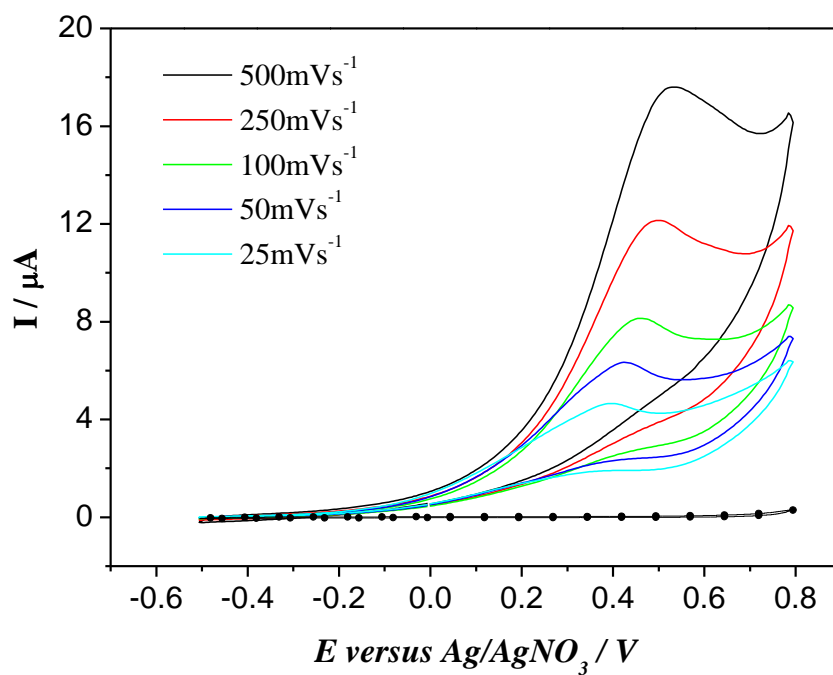

**Fig. S4** - Overlaid cyclic voltammograms of GT carbon paste electrode at different scan rates in presence of 1 mM Na<sub>2</sub>S.

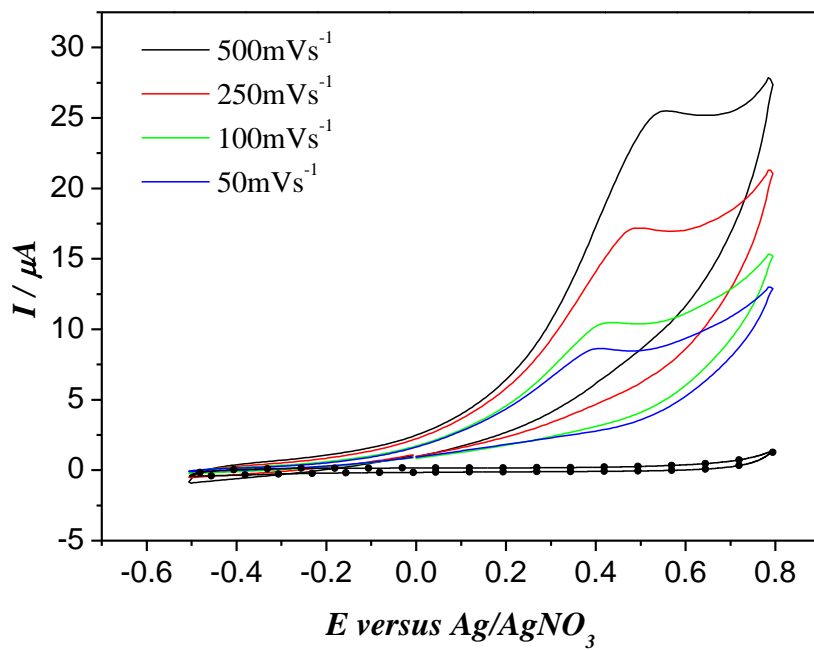

**Fig. S5** - Overlaid cyclic voltammograms of GT80 carbon paste electrode at different scan rates in presence of 1 mM  $\text{Na}_2\text{S}$ .

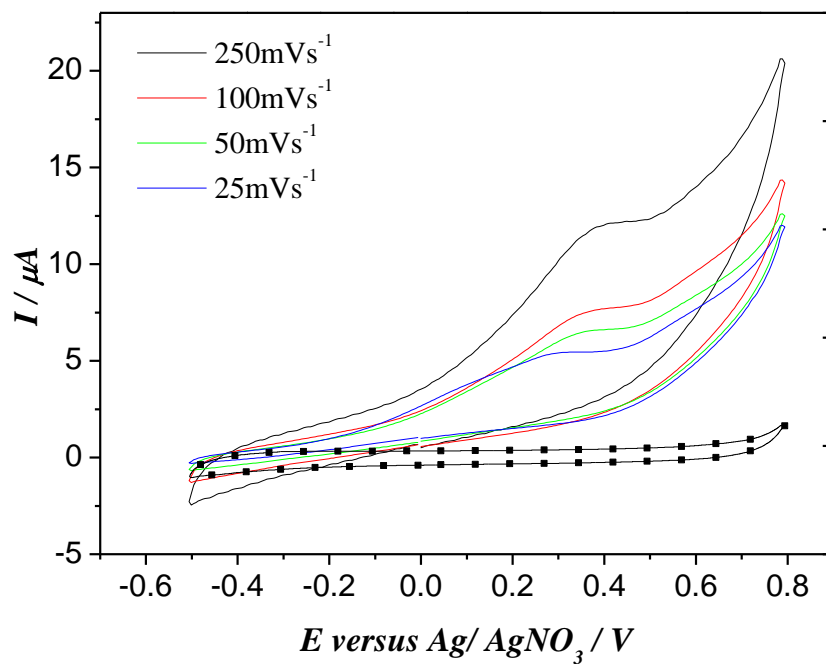

**Fig. S6** - Overlaid cyclic voltammograms of GT140 carbon paste electrode at different scan rates in presence of 1 mM  $\text{Na}_2\text{S}$ .



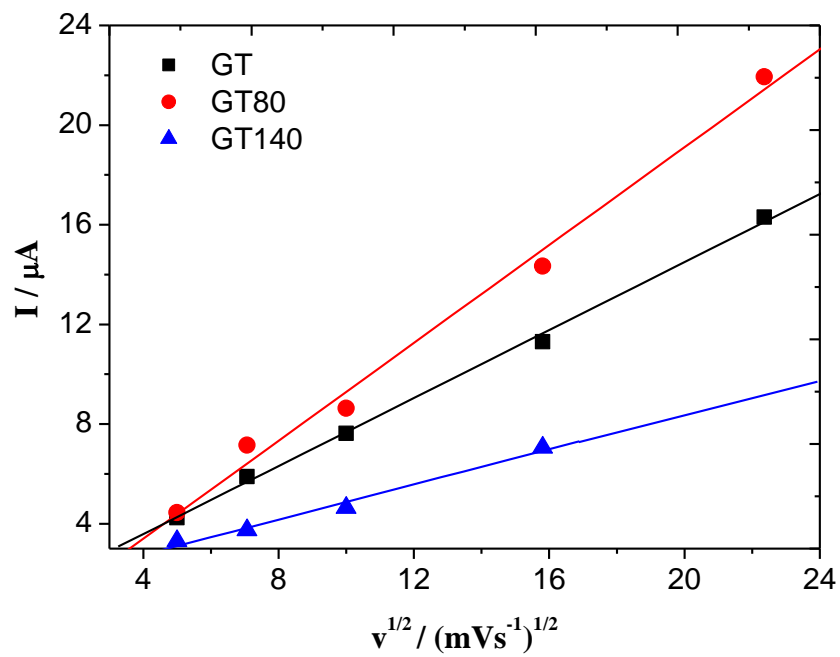

**Fig. S7** - Plot of anodic peak current of sulfide oxidation vs. square root of scan rate obtained with carbon paste electrodes prepared with different graphites.
